# Supplementary material for: Genetic diversity of an endangered palm in forest and open grassland landscapes: informing seed collection and conservation of Butia eriospatha
Source: Research Square preprint supplement (doi:10.21203/rs.3.rs-7457173/v1), 2025-09-03
Supplement: Supplementary file 1 [file e13995ef3076f1943b203346.xlsx]

## Sheet: Table S1
Table S1. Microssatelite primers with their repeat motifs and allele frequencies for mature (adult) and progeny individuals in FOR (forest) and GRA (open grassland) Butia eriospatha populations. F = forward sequence; R = reverse sequence; N = sample size.
				Allele frequencies
Loci	Repeat motifs	Sequence	allele size (bp)	FOR		GRA
		5' - 3'		Mature	Progeny	Mature	Progeny
		F: AGTCATCCATCAAGCTCAAC		N=195	N=120	N=103	N=118
B.eri 7a	(TC)6		166	0.10513	0.40417	0.08738	0.16102
		R: CAAACAACCCAAGATAGAGC	167	0.89487	0.59583	0.91262	0.83898
		F: TTTTCTCTCTTCTTCTCCTCTC		N=155	N=120	N=95	N=120
B.eri 11a	(TTC)4		136	0	0.00417	0	0
		R: CTACTCTTCCAGAATCCAGC	139	0.92903	0.97917	0.95789	0.96667
			140	0.07097	0.01667	0.04211	0.03333
		F: GATGACAAAACACTTGAGCA		N=150	N=120	N=95	N=119
B.eri 15a	(TCAA)3		262	0.37667	0.4	0.37368	0.22689
		R: GGCATCTTTAGTGGTACTTCA	264	0.62333	0.6	0.62632	0.77311
				N=192	N=118	N=102	N=117
		F: CCATAACAGCCGGAGTTTGT	161	0.0026	0	0	0
But 06b	(GA)15		165	0	0.00847	0	0
			175	0	0	0.04412	0.10256
		R: GAAGGATGCTGTTCTTGTTGG	191	0.33073	0.48729	0.30392	0.24786
			199	0.59115	0.42373	0.63235	0.58547
			201	0.07552	0.08051	0.01961	0.0641
				N=185	N=114	N=100	N=112
			248	0	0	0.09	0.12946
			260	0.02703	0.00877	0.065	0.11607
		F: ACGTCATCCCATACCAAGAAA	262	0	0	0.035	0.03571
But 07b	(CA)16(GA)13		268	0.01622	0.04825	0.015	0.01339
		R: TGCCCATTGTAACACGTTATG	270	0.13243	0.12281	0.085	0.08036
			272	0.70541	0.61842	0.475	0.41518
			274	0.11892	0.19737	0.23	0.20089
			276	0	0.00439	0.005	0
			282	0	0	0	0.00893
				N=193	N=118	N=103	N=115
		F: GCGAAATCCAAACCATACG	192	0.12694	0.15254	0.13107	0.08696
But 08b	(CA)9(TA)5		200	0.00259	0	0	0.0087
		R: GCATCATACGAGGGAGGAAT	204	0.33938	0.40678	0.49515	0.38696
			206	0.34974	0.36864	0.13592	0.28261
			208	0	0	0	0.0087
			212	0.18135	0.07203	0.23786	0.22609
				N=195	N=119	N=103	N=118
			150	0.33077	0.38235	0.33495	0.33898
		F: GGCTAAGTTTTCAAAGGGAAGA	154	0.32564	0.32353	0.26214	0.31356
But 09b	(CT)17		156	0.16923	0.13866	0.20874	0.18644
		R: GGGACCTGGTAAAGGAATGA	160	0.12564	0.15546	0.17961	0.16102
			164	0.00513	0	0	0
			166	0.0359	0	0.01456	0
			168	0.00769	0	0	0
		F: TGCACCCGAACCATATAAACT		N=195	N=119	N=102	N=114
But 11b	(TG)5		151	0.82308	0.92437	0.90196	0.93421
		R: CAAGAGGGTGGGGTAAATTG	153	0.16923	0.07563	0.09804	0.06579
			159	0.00769	0	0	0
		F: AGAGCAGAGCTTTGGGAGAA		N=166	N=120	N=97	N=114
But 17b	(CT)9(AT)5(AC)9		200	0.15663	0.15	0.20103	0.14912
		R: GCCATTCATGGACTCCAAA	202	0.84337	0.85	0.79897	0.85088
		F: AGAGGATGGGGCATTTGAT		N=194	N=120	N=103	N=119
But 23b	(CT)12		167	0.21907	0.29583	0.20388	0.28151
		R: CCCTTCCATAAGCATGTTCC	169	0.78093	0.70417	0.79612	0.71849
		Total number of alleles	42
a= Candido-Ribeiro et al., unpublished; b= Nazareno et al., 2011
